# Supplementary material
Source: ML conference proceedings conference paper supplement (https://openaccess.thecvf.com/content/CVPR2024/html/Dong_Low-Rank_Rescaled_Vision_CVPR_2024_paper.html)
Supplement: Supplementary file 1 [file Dong_Low-Rank_Rescaled_Vision_CVPR_2024_supplemental.pdf]

# Low-Rank Rescaled Vision Transformer Fine-Tuning: A Residual Design Approach

## Supplementary Material

### A. Detailed dataset statistic

We describe the details of visual adaptation classification tasks we used in Table 1 (FGVC) and Table 2 (VTAB-1k), including the class number and the train/val/test sets. We employ the split following VPT [13].

### B. Detailed configuration

Table 3 summarizes the detailed configurations we used for experiments. As mentioned in Section 4, we utilize grid search to select hyper-parameters such as learning rate, weight decay, batch size, and dropout rate, using the validation set of each task. AugReg [25] provides a robust initialization for the pre-training model with varying data augmentation and regularization. Despite the need for small initializations in many PEFT methods, RLRR maintains consistent performance under different initializations, as shown in Table 10.

### C. Parameter size analysis

To showcase the parameter-efficiency of our RLRR method, we compare its parameter size with other popular lightweight adaptation methods (Table 4), including Adapter [9], VPT [13], LoRA [10], SSF [18] and ARC [5]. Adapter [9] uses two linear projections to construct a bottleneck structure for each layer, resulting in the introduction of  $2 \cdot D \cdot D' \cdot L$  learnable parameters, where  $D'$  denotes the size of hidden dimension and  $L$  denotes the number of layers. Furthermore, due to the presence of non-linear activations in Adapter, this structure does not allow for re-parameterization, which leads to additional computational overhead in the inference. VPT [13] incorporates  $m$  prompts into input space, leading to an increase of  $m \cdot D$  parameters for VPT-Shallow and  $m \cdot D \cdot L$  for VPT-Deep. In contrast to Adapter, both LoRA [10] and SSF [18] employ linear adaptation methods without incorporating non-linear functions. This design allows them to leverage re-parameterization benefits, thereby mitigating additional computations during inference. Specifically, the adaptation matrix of LoRA, which consists of a down-projection and an up-projection, introduces  $2 \cdot w \cdot D \cdot D' \cdot L$  learnable parameters, where  $w$  denotes the number of attention matrices undergoing adaptation. SSF inserts linear scaling and shifting coefficients after  $o$  operations, resulting in an addition of  $2 \cdot o \cdot D^* \cdot L$  extra parameters.  $D^*$  denotes the dimension of weight matrix, where  $D^* = 4 \cdot D$  in up-projection of FFN and  $D^* = D$  in other cases. ARC offers addi-

tional parameter compression by sharing symmetric projection matrices across different layers. This approach introduces  $D \cdot D'$  parameters for MHA and FFN. The low-dimensional re-scaling coefficients and bias terms result in a total of  $(D' + D) \cdot L$  additional parameters. The proposed RLRR introduces dual-sided scaling tuning resulting in  $3 \cdot o \cdot D^* \cdot L$  trainable parameters.

### D. Experimental details on larger-scale and hierarchical ViT backbones

Table 5, 6 and 7 respectively display the comprehensive results of the comparison conducted in Section 4 among ViT-Large, ViT-Huge, and Swin-Base models.

### E. Expanded experiments with self-supervised pre-training

In addition to the models pre-trained with supervision, we also conduct experiments with self-supervised pre-training approaches: MAE [8] and Moco V3 [3]. Specifically, We utilize MAE and Moco V3 self-supervised pre-trained ViT-B as the backbone and evaluate the performance of our RLRR on VTAB-1k. The results of MAE and Moco V3 self-supervised models are presented in Table 8 and Table 9, respectively. Based on these results, it is noted that our proposed RLRR continues to exhibit competitive performance on two self-supervised ViT models.

### F. Flexibility of RLRR

LoRA, as a universal fine-tuning paradigm, has achieved remarkable performance across multiple tasks due to its flexibility. In this section, we will elaborate on how our proposed RLRR maintains the flexibility comparable to LoRA while achieving superior performance. LoRA adjusts the trainable parameter count by altering the sampling dimensions of the bottleneck structure. Similarly, RLRR can achieve the same adjustment. Initially, we remove the  $\mathbf{W}$  in fine-tuning items  $\Delta \mathbf{W} = \vec{s}_{\text{left}} \odot \mathbf{W} \odot \vec{s}_{\text{right}}^{\top}$ , defining this baseline as  $\mathbf{X}(\mathbf{W} + \mathbf{S}_{\text{left}} \mathbf{S}_{\text{right}}) + \vec{b}^{\top} + \vec{f}^{\top}$  to simulate the LoRA rank = 1 scenario.

After this, we can also introduce variations in the RLRR variant by modifying the dimension  $r$  of the parameter scaling in the expression  $\mathbf{X}(\mathbf{W} + (\mathbf{S}_{\text{left}} \mathbf{S}_{\text{right}}) \odot \mathbf{W}) + \vec{b}^{\top} + \vec{f}^{\top}$ , where  $\mathbf{S}_{\text{left}} \in \mathbb{R}^{d \times r}$  and  $\mathbf{S}_{\text{right}} \in \mathbb{R}^{r \times d}$ . Through this modification, we can derive adaptation matrices with varying ranks to demonstrate the flexibility of adjustments similar

Table 1. Dataset statistics for FGVC. “\*” denotes the train/val split of datasets following the dataset setting in VPT [13].

| Dataset             | Description                             | Classes | Train size | Val size | Test size |
|---------------------|-----------------------------------------|---------|------------|----------|-----------|
| CUB-200-2011 [29]   | Fine-grained bird species recognition   | 200     | 5,394*     | 600*     | 5,794     |
| NABirds [27]        | Fine-grained bird species recognition   | 555     | 21,536*    | 2,393*   | 24,633    |
| Oxford Flowers [22] | Fine-grained flower species recognition | 102     | 1,020      | 1,020    | 6,149     |
| Stanford Dogs [15]  | Fine-grained dog species recognition    | 120     | 10,800*    | 1,200*   | 8,580     |
| Stanford Cars [7]   | Fine-grained car classificatio          | 196     | 7,329*     | 815*     | 8,041     |

Table 2. Dataset statistics for VTAB-1k [32].

| Dataset              | Description | Classes | Train size | Val size | Test size |
|----------------------|-------------|---------|------------|----------|-----------|
| CIFAR-100            | Natural     | 100     | 800/1,000  | 200      | 10,000    |
| Caltech101           |             | 102     |            |          | 6,084     |
| DTD                  |             | 47      |            |          | 1,880     |
| Flowers102           |             | 102     |            |          | 6,149     |
| Pets                 |             | 37      |            |          | 3,669     |
| SVHN                 |             | 10      |            |          | 26,032    |
| Sun397               |             | 397     |            |          | 21,750    |
| Patch Camelyon       | Specialized | 2       | 800/1,000  | 200      | 32,768    |
| EuroSAT              |             | 10      |            |          | 5,400     |
| Resisc45             |             | 45      |            |          | 6,300     |
| Retinopathy          |             | 5       |            |          | 42,670    |
| Clevr/count          | Structured  | 8       | 800/1,000  | 200      | 15,000    |
| Clevr/distance       |             | 6       |            |          | 15,000    |
| DMLab                |             | 6       |            |          | 22,735    |
| KITTI/distance       |             | 4       |            |          | 711       |
| dSprites/location    |             | 16      |            |          | 73,728    |
| dSprites/orientation |             | 16      |            |          | 73,728    |
| SmallNORB/azimuth    |             | 18      |            |          | 12,150    |
| SmallNORB/elevation  |             | 9       |            |          | 12,150    |

Table 3. The implementation details of configurations such as optimizer and hyper-parameters. We select the best hyper-parameters for each download task via using grid search.

| Optimizer              | AdamW                                        |
|------------------------|----------------------------------------------|
| Learning Rate          | {0.2, 0.1, 0.05, 0.01, 0.005, 0.001, 0.0001} |
| Weight Decay           | {0.05, 0.01, 0.005, 0.001, 0}                |
| Dropout Rate           | {0, 0.1, 0.3, 0.5, 0.7}                      |
| Batch Size             | {256, 128, 32}                               |
| Learning Rate Schedule | Cosine Decay                                 |
| Training Epochs        | 100                                          |
| Warmup Epochs          | 10                                           |

Table 4. Comparison of the additional parameter size in both fine-tuning and inference stages with other lightweight adaptation methods.

| Method      | Adapter [9]                  | VPT-Shallow [13] | VPT-Deep [13]       | LoRA [10]                            | SSF [18]                      | ARC [5]                                   | RLRR                          |
|-------------|------------------------------|------------------|---------------------|--------------------------------------|-------------------------------|-------------------------------------------|-------------------------------|
| Fine-Tuning | $2 \cdot D \cdot D' \cdot L$ | $m \cdot D$      | $m \cdot D \cdot L$ | $2 \cdot w \cdot D \cdot D' \cdot L$ | $2 \cdot o \cdot D^* \cdot L$ | $2 \cdot (D \cdot D' + (D' + D) \cdot L)$ | $3 \cdot o \cdot D^* \cdot L$ |
| Inference   | $2 \cdot D \cdot D' \cdot L$ | $m \cdot D$      | $m \cdot D \cdot L$ | 0                                    | 0                             | 0                                         | 0                             |

Table 5. This table is extended from Table 4 in Section 4 and describes the detailed experimental results of the performance comparison on VTAB-1k using ViT-Large pre-trained on ImageNet-21k as the backbone.

| Methods          | Natural     |             |             |             |             |             |             |             |             | Specialized |             |             |             | Structured  |             |             |             |             |             |             | Mean Total  | Params.(M)  |             |       |
|------------------|-------------|-------------|-------------|-------------|-------------|-------------|-------------|-------------|-------------|-------------|-------------|-------------|-------------|-------------|-------------|-------------|-------------|-------------|-------------|-------------|-------------|-------------|-------------|-------|
|                  | CIFAR-100   | Caltech101  | DTD         | Flowers102  | Pets        | SVNH        | Sun397      | Mean        | Camelyon    | EuroSAT     | Resisc45    | Retinopathy | Mean        | Clevr-Count | Clevr-Dist  | DMLab       | KITTI-Dist  | dSpr-Loe    | dSpr-Ori    | sNORB-Azim  |             |             | sNORB-Ele   | Mean  |
| Full fine-tuning | 68.6        | 84.3        | 58.6        | 96.3        | 86.5        | 87.5        | 41.4        | 74.7        | 82.6        | 95.9        | 82.4        | 74.2        | 83.8        | 55.4        | 55.0        | 42.2        | 74.2        | 56.8        | 43.0        | 28.5        | 29.7        | 48.1        | 65.4        | 303.4 |
| Linear probing   | 72.2        | 86.4        | 63.6        | 97.4        | 85.8        | 38.1        | 52.5        | 70.9        | 76.9        | 87.3        | 66.6        | 45.4        | 69.1        | 28.2        | 28.0        | 34.7        | 54.0        | 10.6        | 14.2        | 14.6        | 21.9        | 25.8        | 51.5        | 0.05  |
| Adapter [9]      | 75.3        | 84.2        | 54.5        | 97.4        | 84.3        | 31.3        | 52.9        | 68.6        | 75.8        | 85.1        | 63.4        | 69.5        | 73.5        | 35.4        | 34.1        | 30.8        | 47.1        | 30.4        | 23.4        | 10.8        | 19.8        | 29.0        | 52.9        | 2.38  |
| Bias [31]        | 71.0        | 82.4        | 51.3        | 96.3        | 83.2        | 59.5        | 49.9        | 70.5        | 72.9        | 87.9        | 63.1        | 71.3        | 73.8        | 51.2        | 50.7        | 33.5        | 54.8        | 65.9        | 37.3        | 13.7        | 22.2        | 41.2        | 58.9        | 0.32  |
| VPT-Shallow [13] | 80.6        | 88.2        | 67.1        | 98.0        | 85.9        | 78.4        | 53.0        | 78.7        | 79.7        | 93.5        | 73.4        | 73.1        | 79.9        | 41.5        | 52.5        | 32.3        | 64.2        | 48.3        | 35.3        | 21.6        | 28.8        | 40.6        | 62.9        | 0.15  |
| VPT-Deep [13]    | <b>84.1</b> | 88.9        | 70.8        | 98.8        | 90.0        | 89.0        | 55.9        | <b>82.5</b> | 82.5        | <b>96.6</b> | 82.6        | 73.9        | 83.9        | 63.7        | <b>60.7</b> | 46.1        | 75.7        | <b>83.7</b> | 47.4        | 18.9        | <b>36.9</b> | 54.1        | 70.8        | 0.49  |
| LoRA [10]        | 75.8        | 89.8        | 73.6        | 99.1        | 90.8        | 83.2        | 57.5        | 81.4        | 86.0        | 95.0        | 83.4        | 75.5        | 85.0        | 78.1        | 60.5        | 46.7        | <b>81.6</b> | 76.7        | 51.3        | 28.0        | 35.4        | 57.3        | 72.0        | 0.74  |
| ARC [5]          | 76.2        | 89.6        | 73.4        | 99.1        | 90.3        | <b>90.9</b> | 56.5        | 82.3        | 85.0        | 95.7        | 85.9        | <b>75.8</b> | 85.6        | 78.6        | <b>62.1</b> | 46.7        | 76.7        | 75.9        | 53.0        | 30.2        | 35.2        | 57.3        | 72.5        | 0.18  |
| SSF [18]         | 73.5        | <u>91.3</u> | 70.0        | <u>99.3</u> | <u>91.3</u> | <u>90.6</u> | <u>57.5</u> | 81.9        | 85.9        | 94.9        | 85.5        | 74.4        | 85.2        | <u>80.6</u> | 60.0        | <u>53.3</u> | 80.0        | 77.6        | <u>54.0</u> | <b>31.8</b> | 35.0        | <u>59.0</u> | <u>73.0</u> | 0.60  |
| RLRR             | 79.3        | <b>92.0</b> | <b>74.6</b> | <b>99.5</b> | <b>92.1</b> | 89.6        | <b>60.1</b> | <b>83.9</b> | <b>87.3</b> | 95.3        | <b>87.3</b> | <u>75.7</u> | <b>86.4</b> | <b>82.7</b> | <b>62.1</b> | <b>54.6</b> | <u>80.6</u> | <b>87.1</b> | <b>54.7</b> | <u>31.3</u> | <b>41.9</b> | <b>61.9</b> | <b>75.2</b> | 0.82  |

Table 6. This table is extended from Table 4 in Section 4 and describes the detailed experimental results of the performance comparison on VTAB-1k using ViT-Huge pre-trained on ImageNet-21k as the backbone.

| Methods          | Natural     |             |             |             |             |             |             |             |             | Specialized |             |             |             | Structured  |             |             |             |             |             |             | Mean Total  | Params.(M)  |             |        |
|------------------|-------------|-------------|-------------|-------------|-------------|-------------|-------------|-------------|-------------|-------------|-------------|-------------|-------------|-------------|-------------|-------------|-------------|-------------|-------------|-------------|-------------|-------------|-------------|--------|
|                  | CIFAR-100   | Caltech101  | DTD         | Flowers102  | Pets        | SVNH        | Sun397      | Mean        | Camelyon    | EuroSAT     | Resisc45    | Retinopathy | Mean        | Clevr-Count | Clevr-Dist  | DMLab       | KITTI-Dist  | dSpr-Loe    | dSpr-Ori    | sNORB-Azim  |             |             | sNORB-Ele   | Mean   |
| Full fine-tuning | 58.7        | 86.5        | 55.0        | 96.5        | 79.7        | 87.5        | 32.5        | 70.9        | 83.1        | <u>95.5</u> | 81.9        | 73.8        | 83.6        | 47.6        | 53.9        | 37.8        | 69.9        | 53.8        | 48.6        | 30.2        | 25.8        | 46.0        | 63.1        | 630.90 |
| Linear probing   | 64.3        | 83.6        | 65.2        | 96.2        | 83.5        | 39.8        | 43.0        | 67.9        | 78.0        | 90.5        | 73.9        | 73.4        | 79.0        | 25.6        | 24.5        | 34.8        | 59.0        | 9.5         | 15.6        | 17.4        | 22.8        | 26.1        | 52.7        | 0.06   |
| Adapter [9]      | 69.4        | 84.4        | 62.7        | 97.2        | 84.2        | 33.6        | 45.3        | 68.1        | 77.3        | 86.6        | 70.8        | 71.1        | 76.4        | 28.6        | 27.5        | 29.2        | 55.2        | 10.0        | 15.2        | 11.9        | 18.6        | 24.5        | 51.5        | 5.78   |
| Bias [31]        | 65.7        | 84.3        | 59.9        | 96.6        | 80.6        | 60.1        | 44.9        | 70.3        | 79.7        | 92.8        | 71.5        | 71.6        | 78.9        | 52.3        | 50.4        | 31.2        | 57.7        | 65.9        | 39.7        | 16.7        | 20.2        | 41.7        | 60.1        | 0.52   |
| VPT-Shallow [13] | 70.6        | 84.7        | 64.8        | 96.4        | 85.1        | 75.6        | 46.2        | 74.8        | 79.9        | 93.7        | 77.7        | 73.6        | 81.2        | 40.3        | 60.9        | 34.9        | 63.3        | 61.3        | 38.9        | 19.8        | 24.9        | 43.0        | 62.8        | 0.18   |
| VPT-Deep [13]    | <b>76.9</b> | 87.2        | 66.8        | 97.5        | 84.8        | 85.5        | 46.5        | 77.9        | 81.6        | <b>96.3</b> | 82.5        | 72.8        | 83.3        | 50.4        | 61.2        | 43.9        | <u>76.6</u> | 79.5        | 50.1        | 24.7        | 31.5        | 52.2        | 68.2        | 0.96   |
| LoRA [10]        | 63.0        | 89.4        | 68.1        | 98.0        | 87.0        | 85.2        | 48.7        | 77.1        | 82.2        | 94.3        | 83.1        | <u>74.2</u> | 83.5        | 68.6        | <u>65.0</u> | 44.8        | <u>76.4</u> | 70.8        | 48.8        | 30.4        | <u>38.3</u> | 55.4        | 69.3        | 1.21   |
| ARC [5]          | 67.6        | <u>90.2</u> | <u>69.5</u> | <u>98.4</u> | <u>87.9</u> | <b>90.8</b> | 49.6        | <u>79.1</u> | 84.5        | 94.9        | <b>85.1</b> | <b>74.6</b> | <u>84.8</u> | <b>75.2</b> | <b>66.7</b> | 46.2        | 76.4        | 44.2        | 51.1        | <b>32.2</b> | 37.7        | 53.7        | 69.6        | 0.22   |
| SSF [18]         | 66.6        | <b>91.2</b> | 69.0        | 98.4        | <b>88.1</b> | 88.9        | <u>50.7</u> | 79.0        | 85.0        | 94.1        | 79.3        | 73.9        | 83.1        | 73.9        | 61.2        | 47.9        | 76.2        | <u>82.8</u> | 51.9        | 25.5        | 33.7        | <u>56.6</u> | 70.4        | 0.97   |
| RLRR             | 70.3        | 89.8        | <b>69.7</b> | <b>98.6</b> | 87.8        | 88.5        | <b>51.3</b> | <b>79.4</b> | <b>86.0</b> | 95.0        | <u>84.9</u> | <b>74.6</b> | <b>85.1</b> | 73.8        | 60.1        | <b>49.6</b> | <b>78.6</b> | <b>83.6</b> | <b>52.4</b> | <u>32.0</u> | <b>41.8</b> | <b>59.0</b> | <b>72.0</b> | 1.33   |

Table 7. This table is extended from Table 5 in Section 4 and describes the detailed experimental results of the performance comparison on VTAB-1k using Swin-Base pre-trained on ImageNet-21k as the backbone.

| Methods          | Natural     |             |             |             |             |             |             |             |             | Specialized |             |             |             | Structured  |             |             |             |             |             |             | Mean Total  | Params.(M)  |             |       |
|------------------|-------------|-------------|-------------|-------------|-------------|-------------|-------------|-------------|-------------|-------------|-------------|-------------|-------------|-------------|-------------|-------------|-------------|-------------|-------------|-------------|-------------|-------------|-------------|-------|
|                  | CIFAR-100   | Caltech101  | DTD         | Flowers102  | Pets        | SVNH        | Sun397      | Mean        | Camelyon    | EuroSAT     | Resisc45    | Retinopathy | Mean        | Clevr-Count | Clevr-Dist  | DMLab       | KITTI-Dist  | dSpr-Loe    | dSpr-Ori    | sNORB-Azim  |             |             | sNORB-Ele   | Mean  |
| Full fine-tuning | 72.2        | 88.0        | 71.4        | 98.3        | 89.5        | 89.4        | 45.1        | 79.1        | 86.6        | <b>96.9</b> | <b>87.7</b> | 73.6        | 86.2        | <b>75.7</b> | <b>59.8</b> | <u>54.6</u> | 78.6        | 79.4        | <u>53.6</u> | <b>34.6</b> | <b>40.9</b> | <u>59.7</u> | 72.4        | 86.9  |
| Linear probing   | 61.4        | 90.2        | 74.8        | 95.5        | 90.2        | 46.9        | <b>55.8</b> | 73.5        | 81.5        | 90.1        | 82.1        | 69.4        | 80.8        | 39.1        | 35.9        | 40.1        | 65.0        | 20.3        | 26.0        | 14.3        | 27.6        | 33.5        | 58.2        | 0.05  |
| MLP-4 [13]       | 54.9        | 87.4        | 71.4        | 99.5        | 89.1        | 39.7        | 52.5        | 70.6        | 80.5        | 90.9        | 76.8        | 74.4        | 80.7        | 60.9        | 38.8        | 40.2        | 66.5        | 9.4         | 21.1        | 14.5        | 28.8        | 31.2        | 57.7        | 4.04  |
| Partial [13]     | 60.3        | 88.9        | 72.6        | 98.7        | 89.3        | 50.5        | 51.5        | 73.1        | 82.8        | 91.7        | 80.1        | 72.3        | 81.7        | 34.3        | 35.5        | 43.2        | 77.1        | 15.8        | 26.2        | 19.1        | 28.4        | 35.0        | 58.9        | 12.65 |
| Bias [31]        | 73.1        | 86.8        | 65.7        | 97.7        | 87.5        | 56.4        | 52.3        | 74.2        | 80.4        | 91.6        | 76.1        | 72.5        | 80.1        | 47.3        | 48.5        | 34.7        | 66.3        | 57.6        | 36.2        | 17.2        | 31.6        | 42.4        | 62.1        | 0.25  |
| VPT-Shallow [13] | <u>78.0</u> | <b>91.3</b> | <u>77.2</u> | <u>99.4</u> | 90.4        | 68.4        | 54.3        | <u>79.9</u> | 80.1        | 93.9        | 83.0        | 72.7        | 82.5        | 40.8        | 43.9        | 34.1        | 63.2        | 28.4        | 44.5        | 21.5        | 26.3        | 37.8        | 62.9        | 0.05  |
| VPT-Deep [13]    | <b>79.6</b> | 90.8        | <b>78.0</b> | <b>99.5</b> | 91.4        | 46.5        | 51.7        | <u>76.8</u> | 84.9        | <u>96.2</u> | 85.0        | 72.0        | 84.5        | 67.6        | 59.4        | 50.1        | 74.1        | 74.4        | 50.6        | 25.7        | 25.7        | 53.4        | 67.7        | 0.22  |
| ARC [5]          | 62.5        | 90.0        | 71.9        | 99.2        | 87.8        | 90.7        | 51.1        | 79.0        | <b>89.1</b> | 95.8        | 84.5        | <b>77.0</b> | 86.6        | 75.4        | 57.4        | 53.4        | 83.1        | <b>91.7</b> | <b>55.2</b> | <u>31.6</u> | 31.8        | <b>59.9</b> | 72.6        | 0.27  |
| RLRR             | 66.1        | 90.6        | 75.5        | 99.3        | <b>92.1</b> | <b>90.9</b> | <u>54.7</u> | <b>81.3</b> | <u>87.1</u> | 95.9        | <u>87.1</u> | <u>76.5</u> | <b>86.7</b> | 66.0        | 57.8        | <b>55.3</b> | <b>84.1</b> | <u>91.1</u> | <b>55.2</b> | 28.6        | <u>34.0</u> | 59.0        | <b>73.0</b> | 0.41  |

to LoRA. The results of above RLRR variants are shown in Table 11, which validate our statement.

## G. Transferability Analysis

We extend the RLRR variant to CNN by concatenating CNN kernels. As shown in Fig. 3, by concatenating the convolutional kernels, we transform original convolutional kernel parameters in CNN to a two-dimensional parameter

matrix  $W'$ , allowing RLRR to seamlessly migrate to CNNs. Based on this, we supplement the experiments on CIFAR-100, as shown in Table 12, which demonstrates the transferability of our RLRR on other deep learning model. We will explore applying our approach in future work under the field of NLP. The outcomes of this variant are presented in Table 12, underscoring the versatility of our design.

Table 8. Performance comparison on VTAB-1k using MAE self-supervised pre-trained ViT-Base as backbone.

| Methods          | Natural     |             |             |             |             |             |             |             | Specialized |             |             |             |             | Structured  |             |             |             |             |             |             |             | Mean Total  | Params.(M)  |       |
|------------------|-------------|-------------|-------------|-------------|-------------|-------------|-------------|-------------|-------------|-------------|-------------|-------------|-------------|-------------|-------------|-------------|-------------|-------------|-------------|-------------|-------------|-------------|-------------|-------|
|                  | CIFAR-100   | Caltech101  | DTD         | Flowers102  | Pets        | SVNH        | Sun397      | Mean        | Camelyon    | EuroSAT     | Resisc45    | Retinopathy | Mean        | Clevr-Count | Clevr-Dist  | DMLab       | KITTI-Dist  | dSpr-Loc    | dSpr-Ori    | sNOBB-Azm   | sNOBB-Ele   |             |             | Mean  |
| Full fine tuning | 24.6        | 84.2        | 56.9        | 72.7        | 74.4        | 86.6        | 15.8        | 59.3        | 81.8        | <b>94.0</b> | 72.3        | 70.6        | 79.7        | 67.0        | 59.8        | 45.2        | 75.3        | 72.5        | 47.5        | 30.2        | 33.0        | 53.8        | 61.3        | 85.80 |
| Linear           | 8.7         | 41.5        | 20.6        | 19.2        | 11.3        | 22.3        | 8.6         | 18.9        | 76.5        | 68.6        | 16.6        | 53.2        | 53.7        | 33.6        | 32.5        | 23.0        | 51.1        | 13.0        | 9.9         | 8.5         | 17.9        | 23.7        | 28.2        | 0.04  |
| Bias [31]        | 22.4        | 82.6        | 49.7        | 66.2        | 67.7        | 69.0        | 24.3        | 54.6        | 78.7        | 91.4        | 60.0        | 72.6        | 75.7        | 65.9        | 51.0        | 35.0        | 69.1        | 70.8        | 37.6        | 21.5        | 30.7        | 47.7        | 56.1        | 0.14  |
| Adapter [9]      | <b>35.1</b> | 85.0        | 56.5        | 66.6        | 71.3        | 45.0        | 24.8        | 54.9        | 76.9        | 87.1        | 63.5        | 73.3        | 75.2        | 43.8        | 49.5        | 31.2        | 61.7        | 59.3        | 23.3        | 13.6        | 29.6        | 39.0        | 52.5        | 0.76  |
| VPT-Shallow [13] | 21.9        | 76.2        | 54.7        | 58.0        | 41.3        | 16.1        | 15.1        | 40.0        | 74.0        | 69.5        | 58.9        | 72.7        | 68.8        | 40.3        | 44.7        | 27.9        | 60.5        | 11.8        | 11.0        | 12.4        | 16.3        | 28.1        | 41.2        | 0.04  |
| VPT-Deep [13]    | 8.2         | 55.2        | 58.0        | 39.3        | 45.2        | 19.4        | 21.9        | 35.3        | 77.9        | 91.0        | 45.4        | 73.6        | 72.0        | 39.0        | 40.9        | 30.6        | 53.9        | 21.0        | 12.1        | 11.0        | 14.9        | 27.9        | 39.9        | 0.06  |
| LoRA [10]        | 31.8        | 88.4        | 59.9        | 81.7        | 85.3        | 90.3        | 23.7        | 65.9        | 84.2        | 92.5        | 76.2        | <b>75.4</b> | 82.1        | <b>85.9</b> | 64.1        | 49.4        | 82.8        | <b>83.9</b> | 51.8        | 34.6        | 41.3        | <b>61.7</b> | 67.5        | 0.30  |
| ARC [5]          | 31.3        | <b>89.3</b> | 61.2        | 85.9        | 83.1        | <b>91.6</b> | 24.4        | 66.7        | <b>86.0</b> | <b>94.0</b> | 80.4        | 74.8        | 83.8        | 85.8        | 64.6        | 50.5        | 82.8        | 82.8        | 53.5        | 36.3        | 39.7        | <b>62.0</b> | 68.3        | 0.13  |
| RLRR             | <u>33.6</u> | <u>88.9</u> | <b>62.2</b> | <b>87.3</b> | <b>86.7</b> | 89.1        | <b>25.7</b> | <b>67.6</b> | <b>86.0</b> | <u>93.4</u> | <b>81.3</b> | <u>75.1</u> | <b>84.0</b> | 77.0        | <b>65.5</b> | <b>53.4</b> | <b>84.7</b> | 78.5        | <b>54.5</b> | <b>37.2</b> | <b>43.1</b> | <u>61.7</u> | <b>68.6</b> | 0.33  |

Table 9. Performance comparison on VTAB-1k using Moco V3 self-supervised pre-trained ViT-Base as backbone.

| Methods          | Natural     |             |             |             |             |             |             |             | Specialized |             |             |             |             | Structured  |             |             |             |             |             |             |             | Mean Total  | Params.(M)  |       |
|------------------|-------------|-------------|-------------|-------------|-------------|-------------|-------------|-------------|-------------|-------------|-------------|-------------|-------------|-------------|-------------|-------------|-------------|-------------|-------------|-------------|-------------|-------------|-------------|-------|
|                  | CIFAR-100   | Caltech101  | DTD         | Flowers102  | Pets        | SVNH        | Sun397      | Mean        | Camelyon    | EuroSAT     | Resisc45    | Retinopathy | Mean        | Clevr-Count | Clevr-Dist  | DMLab       | KITTI-Dist  | dSpr-Loc    | dSpr-Ori    | sNOBB-Azm   | sNOBB-Ele   |             |             | Mean  |
| Full fine tuning | 57.6        | 91.0        | 64.6        | 91.5        | 79.9        | 89.8        | 29.1        | 72.0        | 85.1        | <b>96.4</b> | 83.1        | 74.3        | 84.7        | 55.1        | 56.9        | 44.7        | 77.9        | 63.8        | 49.0        | 31.5        | 36.9        | 52.0        | 66.2        | 85.69 |
| Linear           | 62.9        | 85.1        | 68.8        | 87.0        | 85.8        | 41.8        | 40.9        | 67.5        | 80.3        | 93.6        | 77.9        | 72.6        | 81.1        | 42.3        | 34.8        | 36.4        | 59.2        | 10.1        | 22.7        | 12.6        | 24.7        | 30.3        | 54.7        | 0.04  |
| Bias [31]        | 65.5        | 89.2        | 62.9        | 88.9        | 80.5        | 82.7        | 40.5        | 72.9        | 80.9        | 95.2        | 77.7        | 70.8        | 81.1        | 71.4        | 59.4        | 39.8        | 77.4        | 70.2        | 49.0        | 17.5        | 42.8        | 53.4        | 66.4        | 0.14  |
| Adapter [9]      | <b>73.0</b> | 88.2        | 69.3        | 90.7        | 87.4        | 69.9        | 40.9        | 74.2        | 82.4        | 93.4        | 80.5        | 74.3        | 82.7        | 55.6        | 56.1        | 39.1        | 73.9        | 60.5        | 40.2        | 19.0        | 37.1        | 47.7        | 64.8        | 0.98  |
| VPT-Shallow [13] | 68.3        | 86.8        | <b>69.7</b> | 90.0        | 59.7        | 56.9        | 39.9        | 67.3        | 81.7        | 94.7        | 78.9        | 73.8        | 82.3        | 34.3        | 56.8        | 40.6        | 49.1        | 40.4        | 31.8        | 13.1        | 34.4        | 37.6        | 57.9        | 0.05  |
| VPT-Deep [13]    | <u>70.1</u> | 88.3        | 65.9        | 88.4        | 85.6        | 57.8        | 35.7        | 70.3        | 83.1        | 93.9        | 81.2        | 74.0        | 83.0        | 48.5        | 55.8        | 37.2        | 64.6        | 52.3        | 26.5        | 19.4        | 34.8        | 42.4        | 61.2        | 0.05  |
| LoRA [10]        | 58.8        | 90.8        | 66.0        | 91.8        | 88.1        | 87.6        | 40.6        | 74.8        | 86.4        | 95.3        | 83.4        | 75.5        | 85.1        | <b>83.0</b> | <b>64.6</b> | <u>51.3</u> | <b>81.9</b> | 83.2        | 47.5        | 32.4        | 47.3        | 61.4        | 71.3        | 0.30  |
| ARC [5]          | 60.0        | 91.3        | 67.9        | <b>92.8</b> | 89.3        | 91.4        | 40.9        | 76.2        | 87.5        | 95.6        | <b>86.1</b> | <b>75.6</b> | <b>86.2</b> | <b>83.0</b> | 64.2        | 50.2        | 80.6        | <b>85.0</b> | <b>53.0</b> | 34.6        | <b>47.4</b> | <b>62.3</b> | 72.4        | 0.13  |
| RLRR             | 61.8        | <b>91.7</b> | 68.6        | 91.6        | <b>89.5</b> | <b>91.5</b> | <b>41.7</b> | <b>76.6</b> | <b>87.9</b> | <u>96.0</u> | <u>85.4</u> | 75.4        | <b>86.2</b> | <u>79.3</u> | <b>64.6</b> | <b>51.5</b> | <u>81.4</u> | 77.5        | <u>50.4</u> | <b>35.6</b> | 45.9        | <u>62.1</u> | <b>73.1</b> | 0.33  |

Table 10. The impacts of initialization.

| Initialization | Natural (7) | Specialized (4) | Structured (8) |
|----------------|-------------|-----------------|----------------|
| normal         | <b>82.9</b> | 85.4            | 61.4           |
| zero           | 82.4        | 85.1            | 60.8           |
| constant       | 81.6        | 84.2            | 60.9           |
| uniform        | 82.5        | 85.6            | 61.4           |
| RLRR           | 82.7        | <b>85.8</b>     | <b>61.8</b>    |

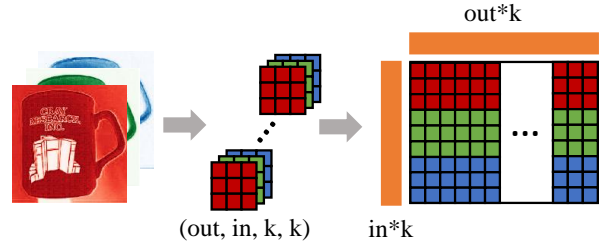

Figure 3. Illustration of the RLRR method’s extension to CNN.

Table 11. Ablation study on VTAB-1k to compare with baseline.

| Method      | Natural (7) | Specialized (4) | Structured (8) | Params |
|-------------|-------------|-----------------|----------------|--------|
| w/o W       | 81.3        | 85.5            | 57.5           | 0.33   |
| w/ W        | <b>82.7</b> | <b>85.8</b>     | <b>61.8</b>    | 0.33   |
| LoRA (r=16) | 80.4        | 85.2            | 61.0           | 0.63   |

Table 12. Performance comparison of RLRR extended to CNNs.

| Methods          | ResNet-18   |        | ResNet-50   |        |
|------------------|-------------|--------|-------------|--------|
|                  | CIFAR-100   | Params | CIFAR-100   | Params |
| Full fine-tuning | <b>79.7</b> | 11.23  | 80.7        | 23.71  |
| Linear probing   | 62.1        | 0.05   | 66.8        | 0.21   |
| RLRR(r=1)        | 75.0        | 0.08   | 79.0        | 0.27   |
| RLRR(r=10)       | 78.9        | 0.29   | <b>82.4</b> | 0.85   |

## H. Combination of multiple RLRRs

RLRR can be likened to a LoRA with rank = 1. Consequently, operations like element-wise combination and arithmetic applied to LoRAs, as demonstrated in LCM-LoRA[21], LoRAHub [11], and Composing PEMs[33], are also applicable to PLRR. The various combinations of RLRRs within their respective frameworks can be expressed in the form of  $\hat{\mathbf{S}}_{\text{left}}\hat{\mathbf{S}}_{\text{right}} = \sum_i^N w_i \mathbf{S}_{\text{left}}^i \sum_i^N w_i \mathbf{S}_{\text{right}}^i$  with  $\hat{\mathbf{f}}^{\top} = \sum_i^N w_i \mathbf{f}_i^{\top}$ , and  $\hat{\mathbf{S}}_{\text{left}}\hat{\mathbf{S}}_{\text{right}} = \sum_i^N \mathbf{S}_{\text{left}}^i \mathbf{S}_{\text{right}}^i$  with  $\hat{\mathbf{f}}^{\top} = \sum_i^N w_i \mathbf{f}_i^{\top}$ .
